# Supplementary material for: Microbial iron limitation in the ocean’s twilight zone
Source: Research Square preprint supplement (doi:10.21203/rs.3.rs-3749755/v1), 2024-01-17
Supplement: Supplementary file 1 [file 1ab36ce0ae290e9d7c8b58c2.docx]

**Extended Data**

**Extended Figure 1: Molecular structures of representative marinobactins and amphibactins identified in GP15 samples.** Amphibactins and marinobactins are distinguished by the number and type of amino acids in the iron complexing peptide head group. Each family of siderophores has multiple homologues that differ in the number of CH2 groups and unsaturations in the fatty acid side chain.

**Extended Figure 2: Characterization of siderophores in GP15 samples**. **a**) The 56Fe-chromatogram by liquid chromatography-inductively coupled plasma mass spectrometry for sample at Station 16, 400 m. **b-e**) Extracted ion chromatograms (EIC) by liquid chromatography-electrospray ionization mass spectrometry from the same sample. Blue traces correspond to the 56Fe-siderophore [M+H]+ isotopologue while red traces correspond to the less abundant 54Fe-siderophore [M+H]+ isotopologue. The intensity of the 54Fe-isotopologue has been scaled by the 56Fe/54Fe crustal abundance ratio of 15.7. Peaks were assigned as (b) 56Fe-Marinobactin A (*m/z* 985.401), (c) 56Fe-Marinobactin B (*m/z* 1011.416), (d) 56Fe-Marinobactin C (*m/z* 1013.432) and (e) 56Fe-Marinobactin D (*m/z* 1039.452).

**Extended Figure 3:** **Validation of the 57Fe-siderophore** **amendment**. 57Fe-(dark blue trace) and 56Fe-(light blue trace) chromatograms of **a**) amphibactin and **b**) marinobactin mixtures used for the siderophore uptake experiment, **c**) EIC for 57Fe-amphibactins in the amphibactin stock solution. Peaks were assigned as (A) 57Fe-Amphibactin-C10:0 (*m/z* 830.353), (B) 57Fe- Amphibactin-C12:1 (*m/z* 856.368), (C) 57Fe-Amphibactin-T (*m/z* 858.384) and (D) 57Fe-Amphibactin-S (*m/z* 884.400). The peak with an *m/z* of 900.394 also represents an 57Fe-Amphibactin but does not contribute to the major peaks in Figure 4; **d**) the EIC for 57Fe-marinobactins in the marinobactin stock solution. Peaks were assigned as (A) 57Fe-Marinobactin A (*m/z* 986.406), (B) 57Fe-Marinobactin B (*m/z* 1012.420), (C) 57Fe-Marinobactin-C (*m/z* 1014.437) and (D) 57Fe-Marinobactin-D (*m/z* 1040.452).

**Extended Figure 4: Sectional plots of DFe:nitrate ratio between the surface and 500 m in different ocean basins.**  **a**) GEOTRACES GP19 section in the South Pacific Ocean along 170oW; **b**) GEOTRACES GP16 section in the Equatorial Pacific Ocean along 10o-15oS; **c**) GEOTRACES GN01 section in the Arctic Ocean along 140oW-180oE; **d**) GEOTRACES GA03 section in the North Atlantic Ocean along 15-40oN; **e**) GEOTRACES GI04 section in the Indian Ocean along 40o-85oE; **f**) GEOTRACES GA10 section in the South Atlantic along 35o-40oS. The data was extracted from GEOTRACES International Data Product 201771 and 202172.

**Extended Table 1:** The concentration of siderophores in the particulate samples paired with dissolved samples of the closest depth collected at that station. The suites of siderophores found in seawater and suspended particles are different. The siderophores in seawater are marinobactins and amphibactins, while the siderophore in particulate matter is Ferrioxamine G. Sampling details for particulate matter collection can be found in Xiang and Lam73

| Sample | Station | Depth (m) | | [Fe-siderophore]  Particulate (pM) | [Fe-siderophore]  Dissolved (pM) |
| --- | --- | --- | --- | --- | --- |
| GT12706 | 6 | 38 | 7.8 | | 66 at 20 m |
| GT12707 | 6 | 58 | 2.8 | | 35 at 90 m |
| GT12709 | 6 | 248 | 0.04 | | 21 at 250 m |
| GT12710 | 6 | 348 | 0.02 | | 21 at 350 m |
| GT12875 | 8 | 61 | 0.26 | | 14 at 65 m |
| GT12876 | 8 | 86 | 0.04 | | 8 at 90 m |
| GT13395 | 14 | 71 | 0.33 | | 5 at 75 m |
| GT13396 | 14 | 96 | 0.32 | | 6 at 100 m |
| GT13397 | 14 | 121 | 0.16 | | 3 at 125 m |
| GT13398 | 14 | 145 | 0.05 | | 11 at 150 m |

**Extended Table 2:** The concentrations of Fe- and Al-siderophores (Fe-S and Al-S respectively) at each sampling depth for peaks A-D in the 0.2 µm filtered controls and in unfiltered samples after 5 days of incubation.

| **Depth (m)** | | **Peak A (pM)** | | **Peak B (pM)** | | **Peak C (pM)** | | **Peak D (pM)** | |
| --- | --- | --- | --- | --- | --- | --- | --- | --- | --- |
|  |  |  |  |  |  |  |  |  |  |
|  |  | 57Fe-S | 27Al-S | 57Fe-S | 27Al-S | 57Fe-S | 27Al-S | 57Fe-S | 27Al-S |
|  |  |  |  |  |  |  |  |  |  |
| 75 | | 45.4 | 0 | 41.5 | 0 | 52.8 | 0 | 20.3 | 0 |
|  | |
| 100 | | 33.1 | 0.3 | 27.1 | 0.7 | 34.8 | 0.9 | 13.0 | 0.2 |
|  | |  |  |  |  |  |  |  |  |
| 150 | | 38.2 | 0 | 37.9 | 0 | 57.6 | 0 | 21.7 | 0 |
|  | |  |  |  |  |  |  |  |  |
| 200 | | 1.9 | 0.6 | 3.0 | 3.8 | 0.8 | 1.8 | 2.3 | 1.4 |
|  | |  |  |  |  |  |  |  |  |
| 250 | | 6.9 | 2.0 | 6.4 | 4.3 | 10.6 | 3.9 | 4.5 | 0.6 |
|  | |  |  |  |  |  |  |  |  |
| 300 | | 0.6 | 1.4 | 0.2 | 2.6 | 0.8 | 1.8 | 0.3 | 0.7 |
|  | |  |  |  |  |  |  |  |  |
| 350 | | 0.7 | 2.0 | 0.5 | 4.3 | 0.8 | 3.4 | 0.3 | 0.5 |
|  | |  |  |  |  |  |  |  |  |
| 400 | | 0.5 | 1.3 | 0.4 | 4.7 | 0.6 | 2.6 | 0.2 | 0.8 |
|  | |  |  |  |  |  |  |  |  |
| 450 | | 57.2 | 0 | 54.4 | 0 | 76.6 | 0 | 28.0 | 0 |
|  | |  |  |  |  |  |  |  |  |
| Control (200m) | | 61.4 | 0.2 | 53.8 | 0.4 | 94.3 | 0.6 | 40.0 | 0 |
|  | |  |  |  |  |  |  |  |  |
| Control (400m) | | 58.8 | 0.1 | 54.2 | 0.4 | 88.3 | 0.4 | 37.8 | 0 |
|  | |  |  |  |  |  |  |  |  |

**Extended Table 3:** The concentration of total peak A-D siderophores from the 5 day incubation experiments after 57Fe addition.

|  | Peak A (pM) | Peak B (pM) | Peak C (pM) | Peak D (pM) |
| --- | --- | --- | --- | --- |
| 75 m | 42.1 | 50.5 | 49.1 | 15.8 |
| 150 m | 52.3 | 67.6 | 71.7 | 22.3 |
| 200 m | 35.6 | 40.8 | 57.6 | 16.3 |
| 400 m | 39.7 | 46.5 | 55.0 | 15.9 |
| 450 m  Control | 64.3  60.1 | 82.2  54.0 | 92.3  91.3 | 29.3  38.9 |
